# Supplementary material
Source: PubMed Central journal article supplement (PMC10023508)
Supplement: NIHMS1871880-supplement-1.pdf [file NIHMS1871880-supplement-1.pdf]

A

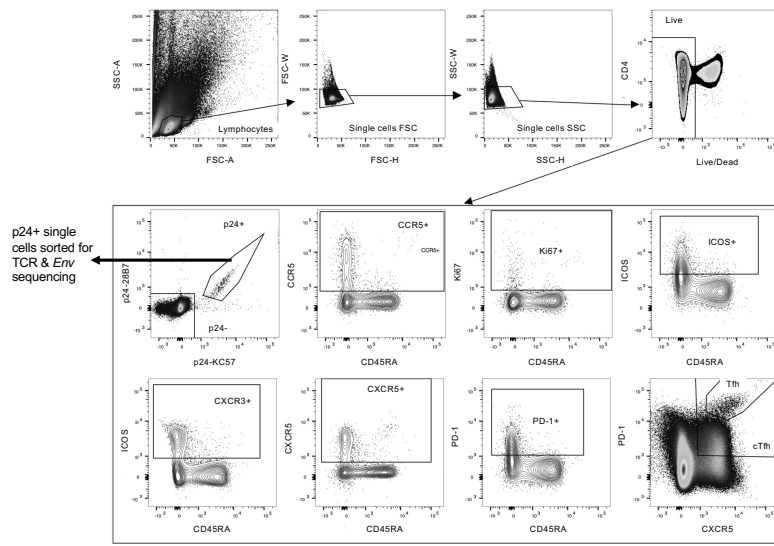

B

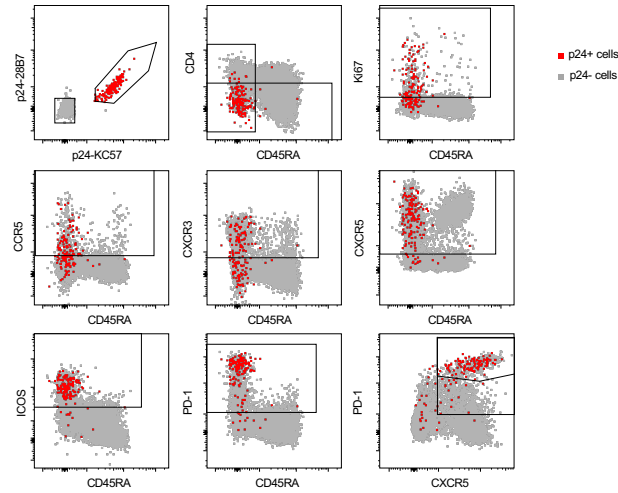

C

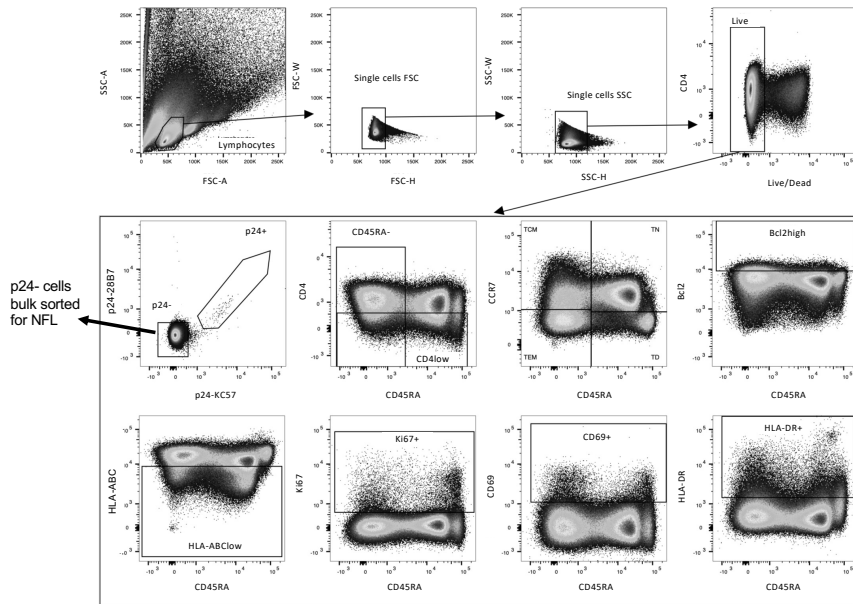

**Figure S1. Gating strategy for single cell sorting, Related to Figures 1 and 6.**

**A.** Gating strategy used for index cell sorting of p24<sup>+</sup> cells for subsequent TCR and HIV Env sequencing with recording of CD45RA, CCR5, Ki67, ICOS, CXCR3, CXCR5 and PD-1 expression. **B.** Representative dot plots showing expression of CD4, CD45RA, Ki67, CCR5, CXCR3, CXCR5, ICOS and PD-1 in p24<sup>+</sup> cells (in red), overlaid onto p24<sup>-</sup> cells (in grey). **C.** Gating strategy used to quantify *ex vivo* and induced p24<sup>+</sup> cells before and after 96 weeks of ART. Bulk p24<sup>-</sup> cells were sorted for proviral HIV DNA quantification and near-full length sequencing (NFL).

A

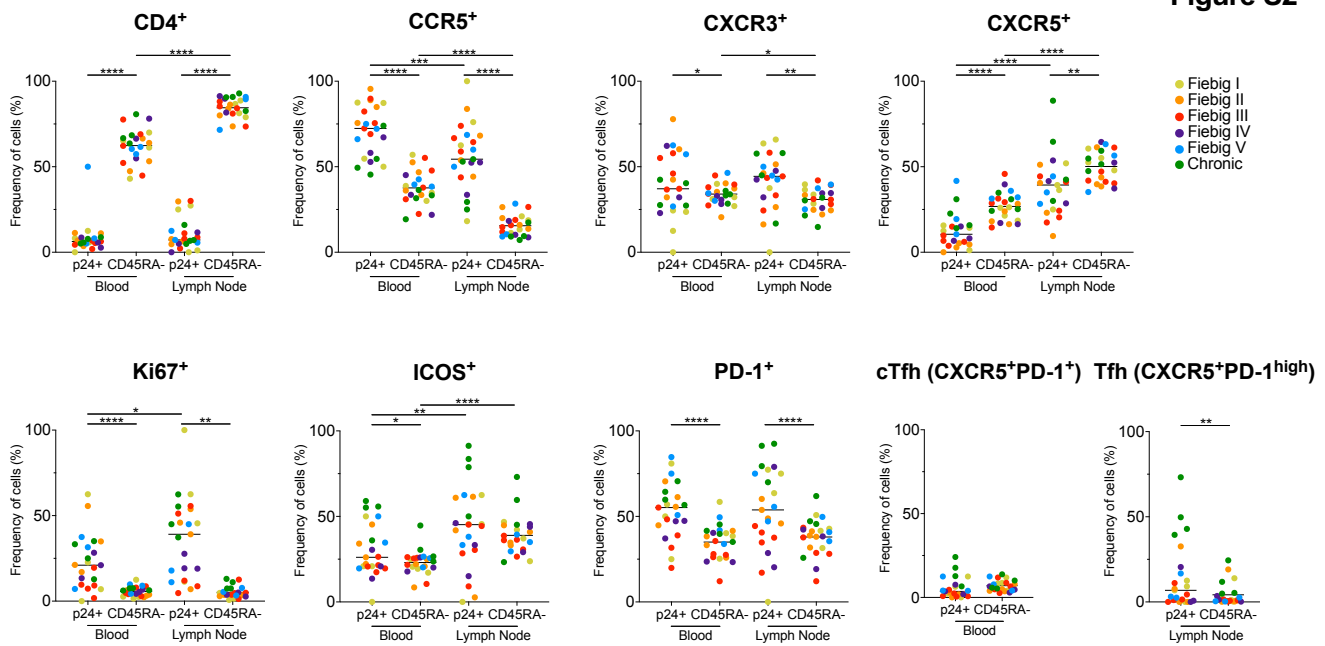

B

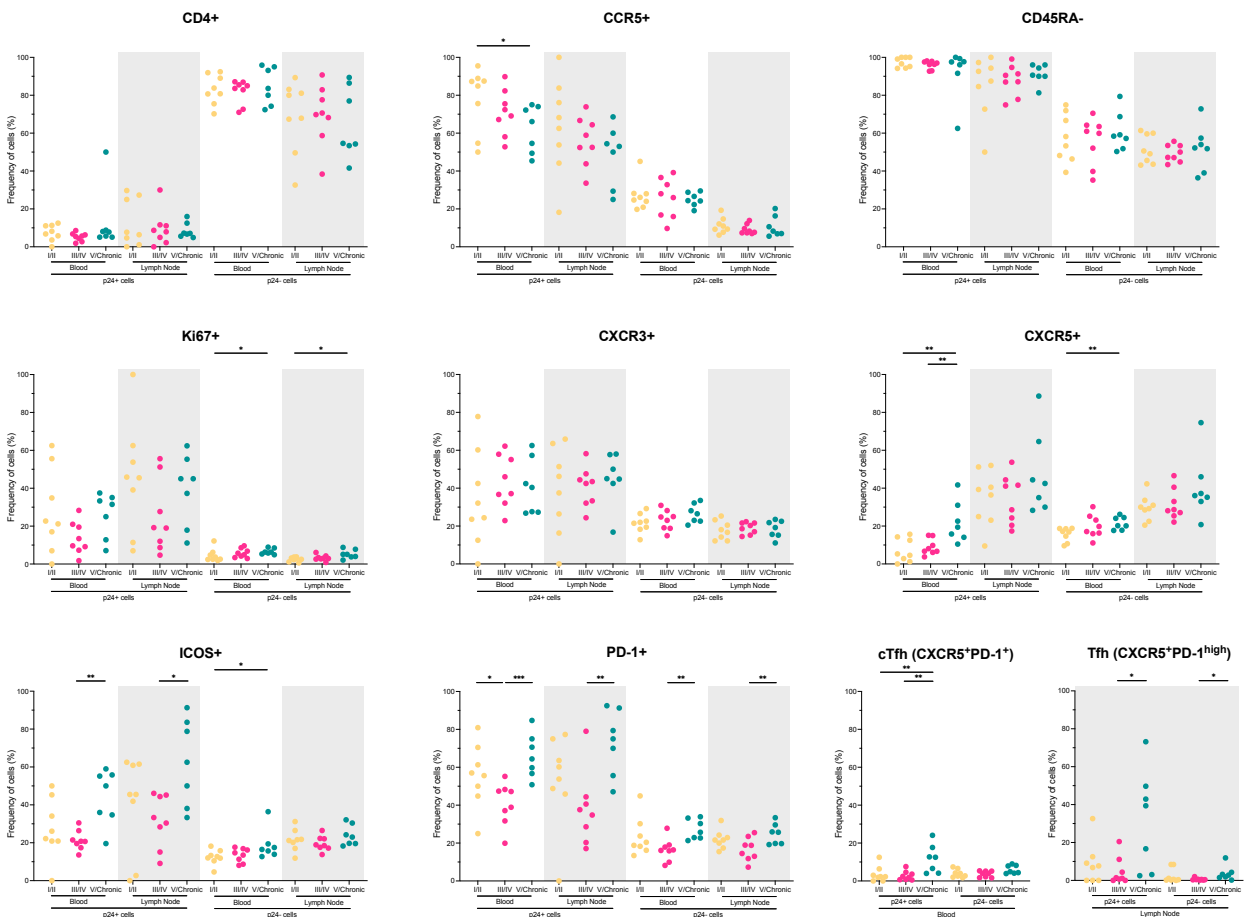

**Figure S2. Expression frequencies of cellular markers on p24<sup>+</sup> cells compared to memory (CD45RA<sup>-</sup>) cells, Related to Figure 1.**

**A.** Phenotype of productively infected cells compared to memory cells. Frequencies of p24<sup>+</sup> and CD45RA<sup>-</sup> cells from blood and lymph node expressing each marker or combination of markers (CD4<sup>+</sup>, CCR5<sup>+</sup>, Ki67<sup>+</sup>, CXCR3<sup>+</sup>, CXCR5<sup>+</sup>, PD-1<sup>+</sup>, ICOS<sup>+</sup>, circulating T follicular helpers (cTfh) cells and Tfh cells) are depicted for each participant. **B.** In each panel, the frequency of p24<sup>+</sup> (left) and p24<sup>-</sup> (right) cells from blood and lymph node expressing a given marker or combination of markers (CD4<sup>+</sup>, CCR5<sup>+</sup>, CD45RA<sup>-</sup>, Ki67<sup>+</sup>, CXCR3<sup>+</sup>, CXCR5<sup>+</sup>, PD-1<sup>+</sup>, ICOS<sup>+</sup>, circulating T follicular helpers (cTfh) cells and Tfh cells) is depicted for Fiebig stages (I/II) (acute infection), III/IV (early infection) and V/chronic (early chronic infection). (Mann-Whitney;  $p < 0.05$ , \*;  $p < 0.01$  \*\*,  $p < 0.001$  \*\*\*,  $p < 0.0001$  \*\*\*\*).

**A**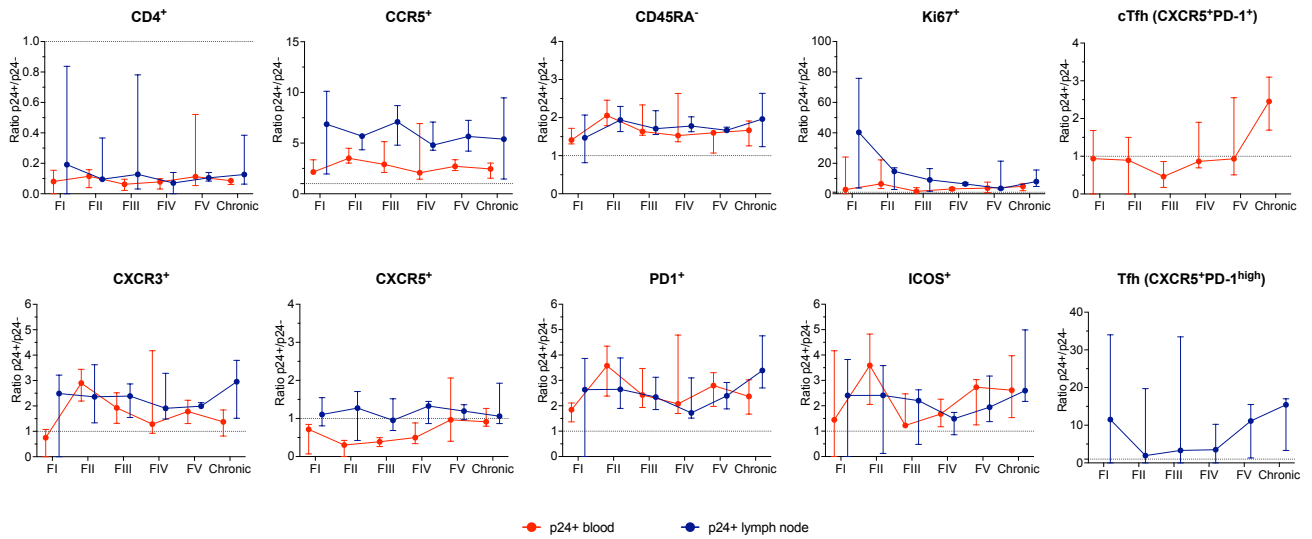**B**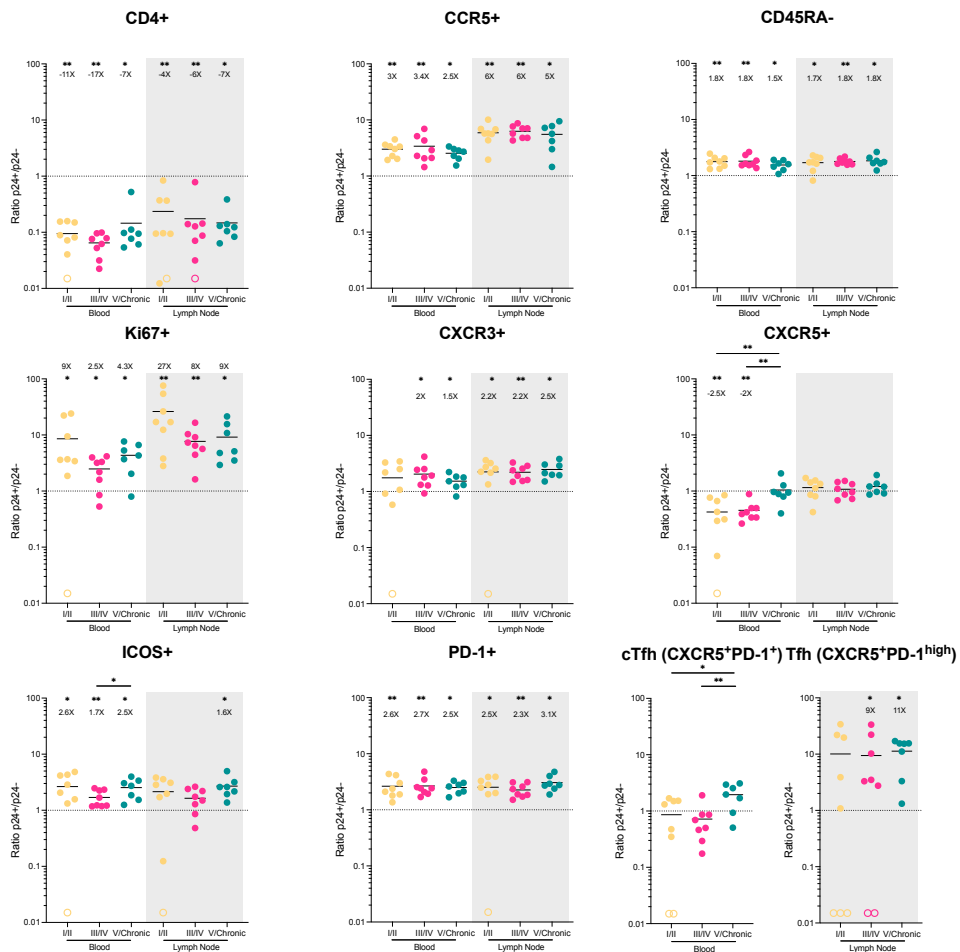

**Figure S3. Productively infected and non-infected CD4<sup>+</sup> T cells display distinct phenotypes, Related to Figure 1.**

**A.** Ratio of frequencies of cells (p24<sup>+</sup>/p24<sup>-</sup>) from blood (red) or lymph node (blue) expressing each marker or combination of markers (CD4<sup>+</sup>, CCR5<sup>+</sup>, CD45RA<sup>-</sup>, Ki67<sup>+</sup>, CXCR3<sup>+</sup>, CXCR5<sup>+</sup>, PD-1<sup>+</sup>, ICOS<sup>+</sup>, circulating T follicular helpers (cTfh) cells and Tfh cells) is depicted for each Fiebig stage (I to V and Chronic infection). Median values are plotted with 95% CI. **B.** In each panel, the ratio of frequencies (p24<sup>+</sup>/p24<sup>-</sup>) of cells from blood (left) or lymph node (right) expressing each marker or combination of markers (CD4<sup>+</sup>, CCR5<sup>+</sup>, CD45RA<sup>-</sup>, Ki67<sup>+</sup>, CXCR3<sup>+</sup>, CXCR5<sup>+</sup>, PD-1<sup>+</sup>, ICOS<sup>+</sup>, circulating T follicular helpers (cTfh) cells and Tfh cells) is depicted for Fiebig stages (I/II) (acute infection), III/IV (early infection) and V/chronic (early chronic infection). Median values are shown as horizontal bars. (Mann-Whitney or Wilcoxon; p<0.05, \*, p<0.01\*\*, p<0.001, \*\*\*, p<0.0001 \*\*\*\*).

A

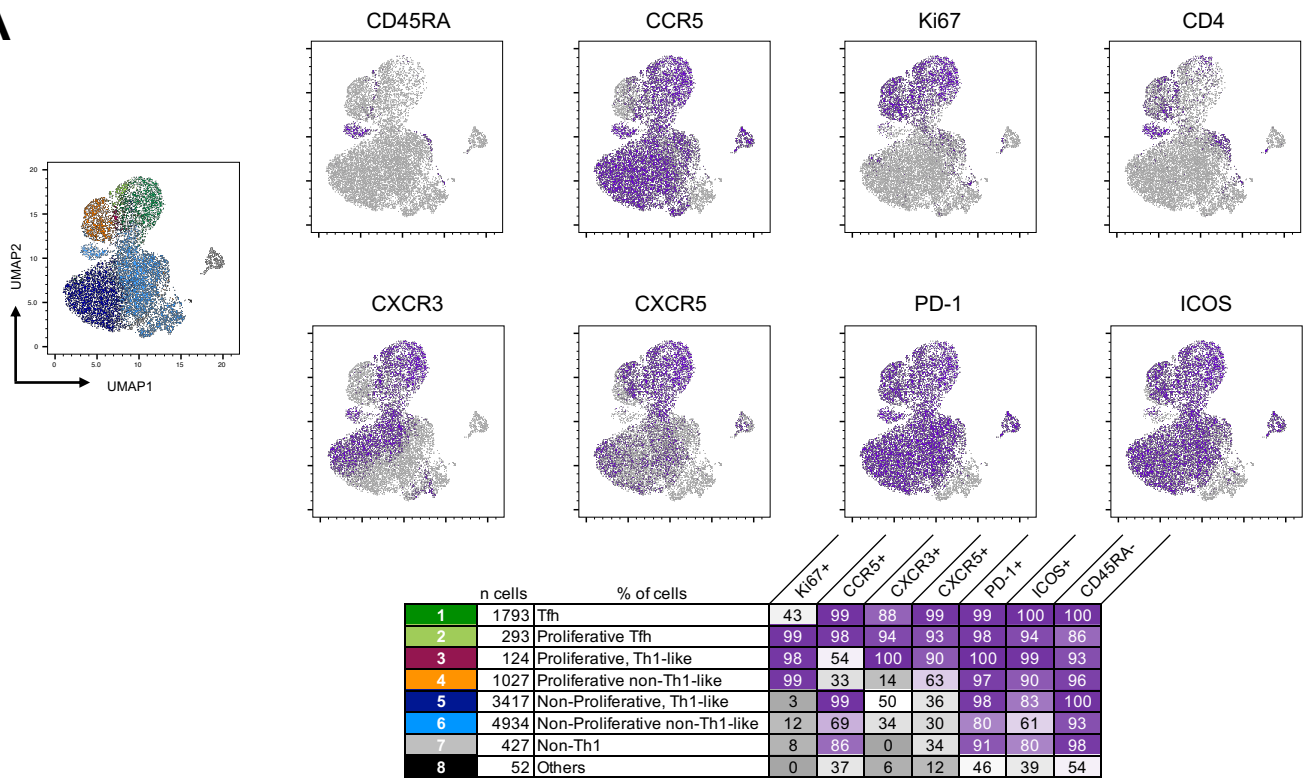

B

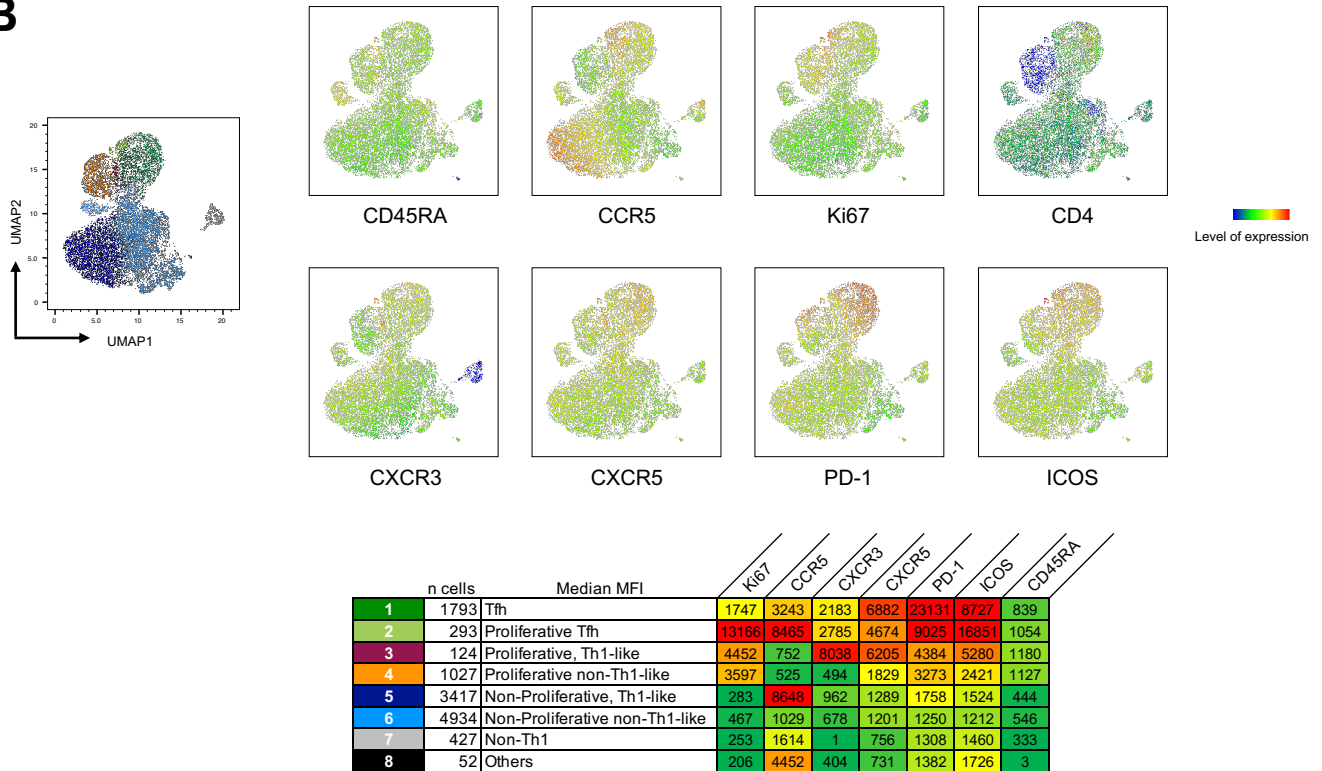

**Figure S4. Expression of cellular markers in p24+ cells clusters, Related to Figure 2.**

p24<sup>+</sup> cells phenotypic data from 23 participants were integrated in a UMAP analysis and generated 8 cell clusters (left). **A.** Percentage of expression, or **B.** mean fluorescence intensity [MFI] of CD45RA, CCR5, Ki67, CD4, CXCR3, CXCR5, PD-1 and ICOS are depicted. The tables show the phenotype of each cell cluster and the percentage of expression (A) or MFI (B) of each marker.

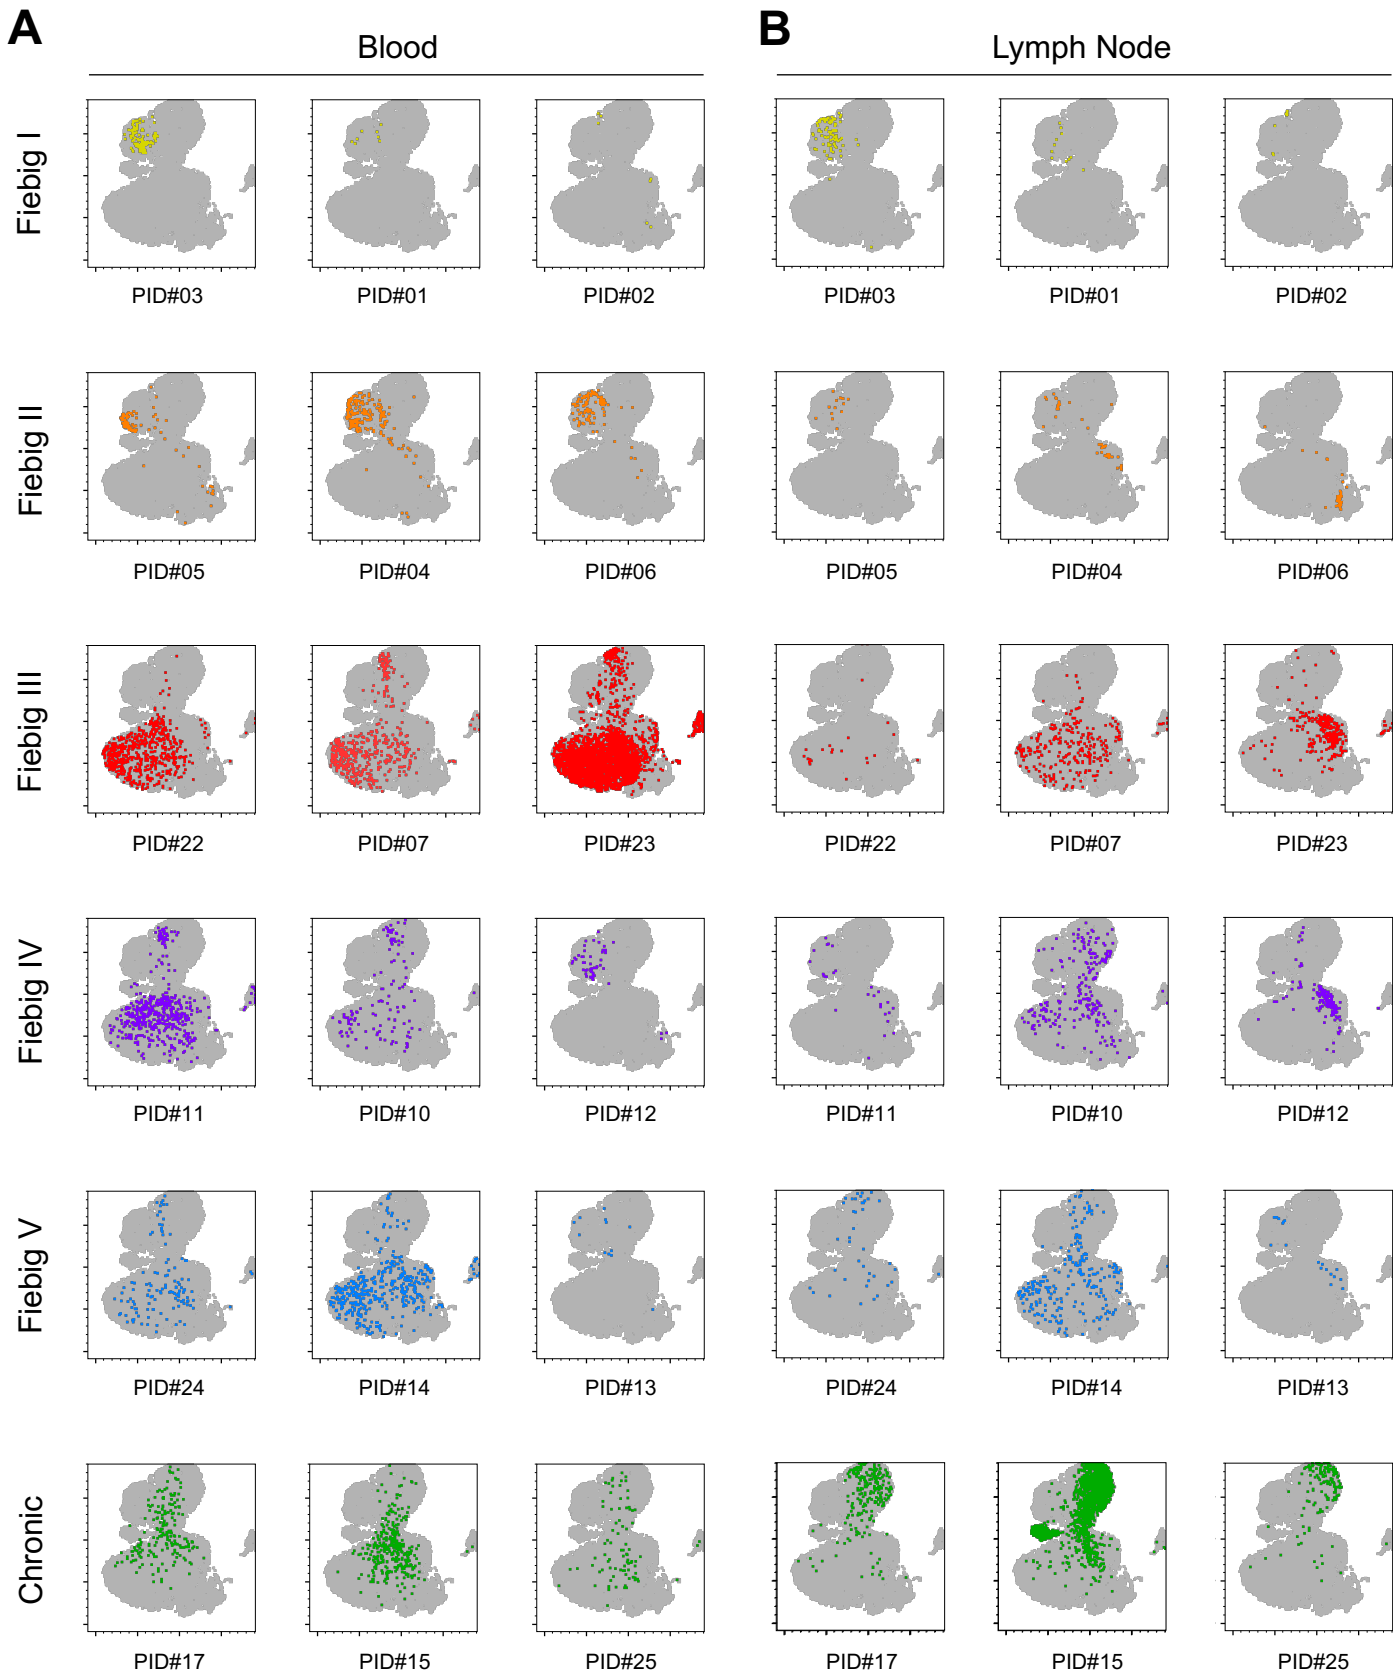

**Figure S5. Clustering of p24<sup>+</sup> cells in representative participants, Related to Figure 2.**

Dot plots of the UMAP analysis of p24<sup>+</sup> cells from individual participants and from blood (panel A) and lymph node (panel B). p24<sup>+</sup> cells are overlaid in colors.

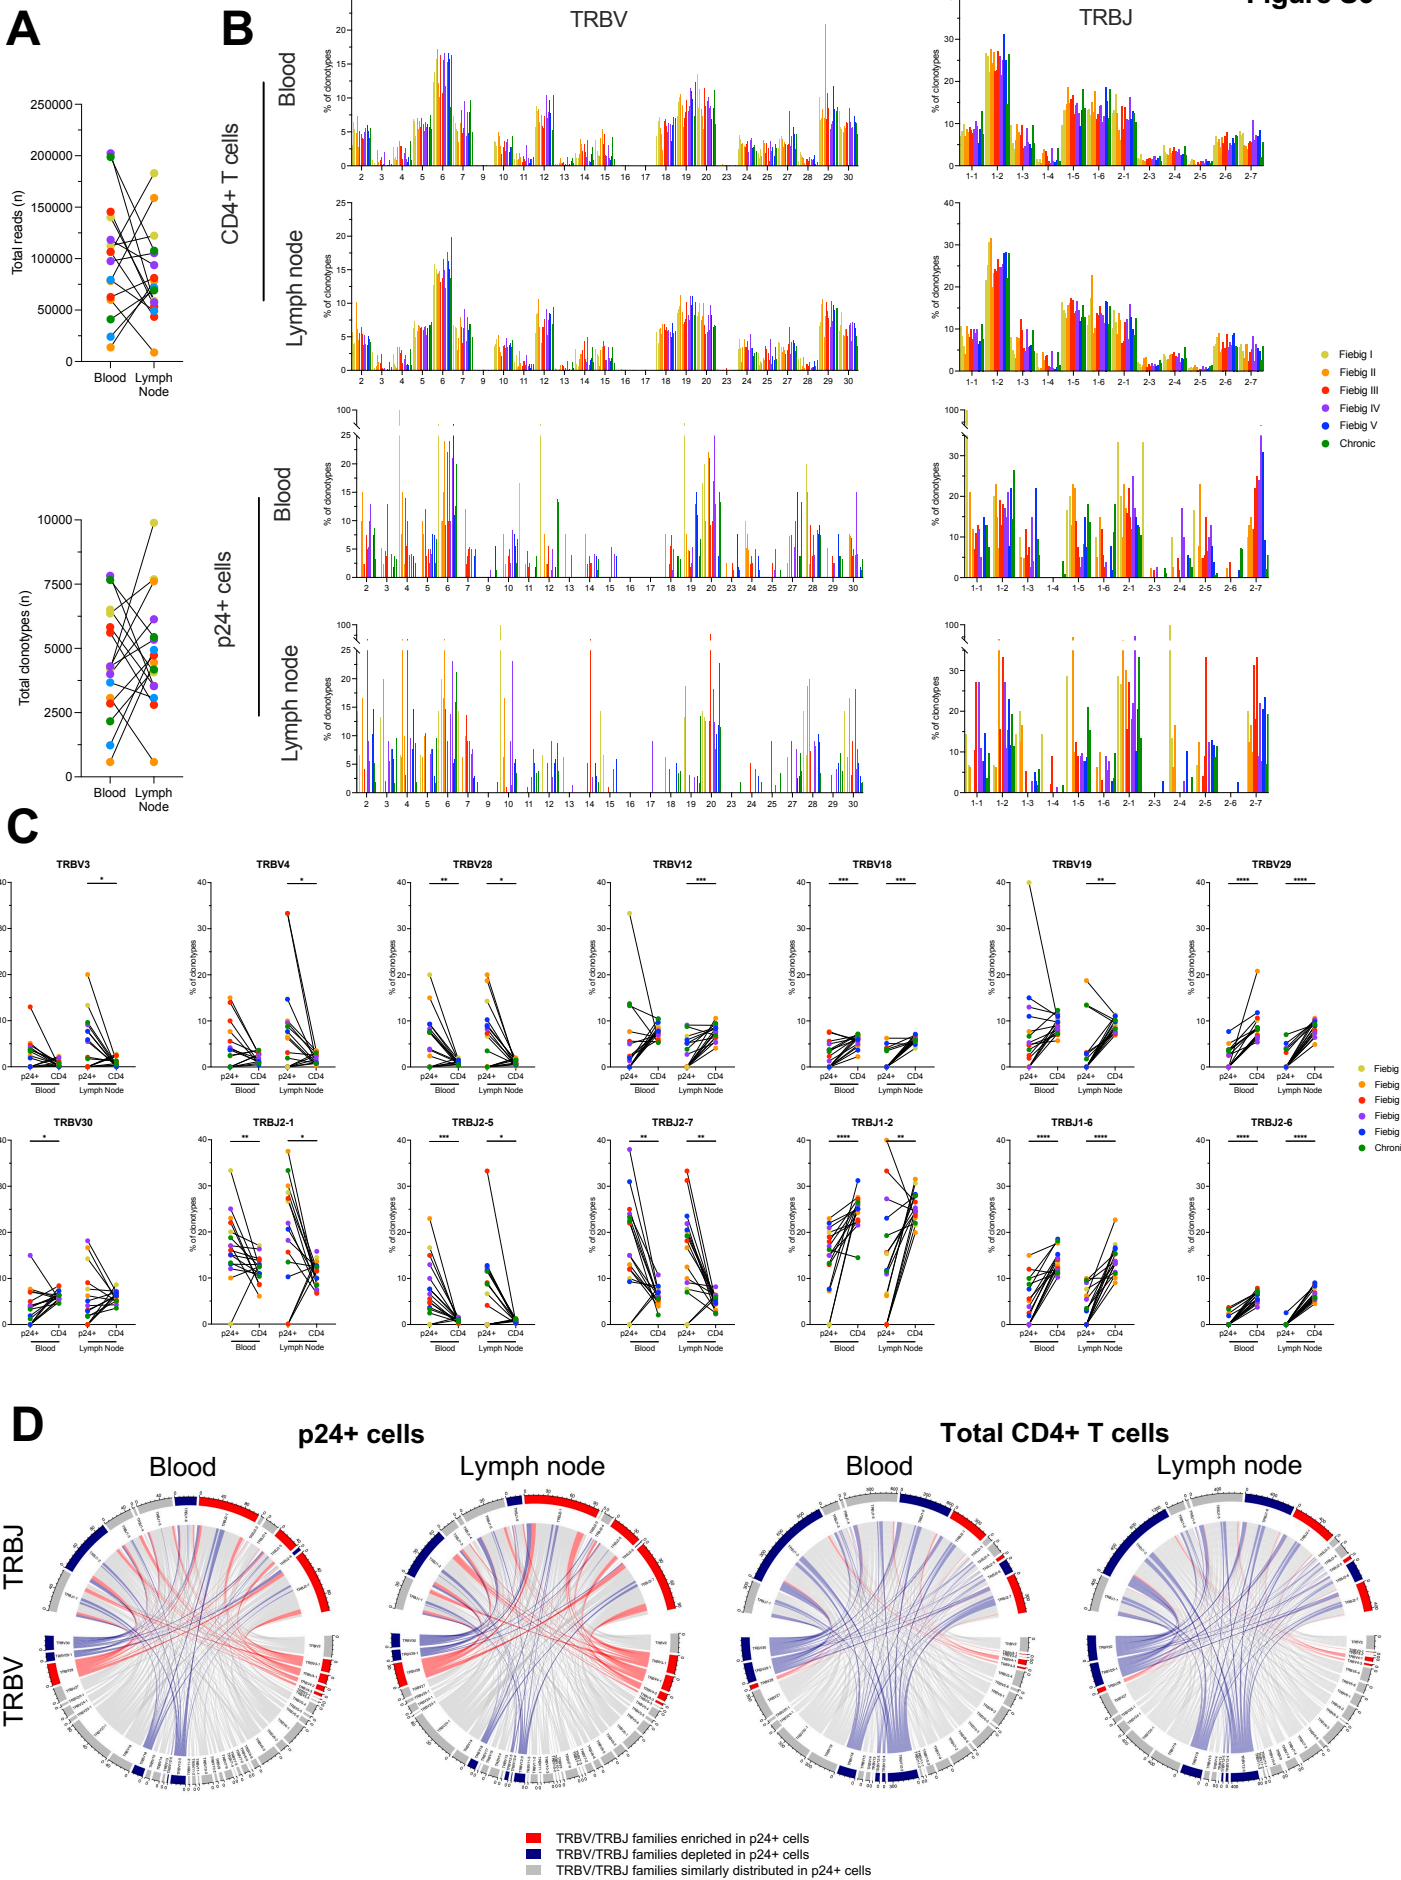

**Figure S6. The TCR repertoire of p24<sup>+</sup> cells is biased, Related to Figure 5.**

**A.** Number of TCR reads and clonotypes in paired blood and lymph nodes samples retrieved after TCR bulk sequencing of total CD4<sup>+</sup> T cells. **B.** Frequency of TRBV and TRBJ segment usage for the clonotypes identified by TCR $\beta$  sequencing in p24<sup>+</sup> cells and in total CD4<sup>+</sup> T cells in both blood and lymph nodes. Each bar represents a single participant and is colored according to the stage of infection. **C.** Significant differences in the frequencies of TRBV and TRBJ segment usage for the clonotypes identified by TCR $\beta$  sequencing in p24<sup>+</sup> cells and in total CD4<sup>+</sup> T cells. (Wilcoxon; p<0.05, \*; p<0.01\*\*, p<0.001, \*\*\*; p<0.0001 \*\*\*\*). **D.** Association between the TRBV and TRBJ segments in p24<sup>+</sup> and total CD4<sup>+</sup> cells from blood and lymph nodes from all participants. The circular axis represents the number of clonotypes in each TRBV (bottom) and TRBJ gene families (top). TRBV and TRBJ genes that were significantly increased/decreased in p24<sup>+</sup> cells are highlighted with a red or blue background, respectively and so is the association link starting from the TRBV gene (Wilcoxon, as defined in C.).

**A** Clonotype distribution

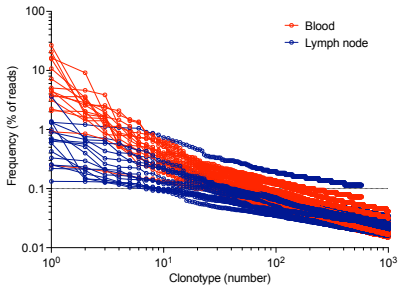

**B** Clonal expansion

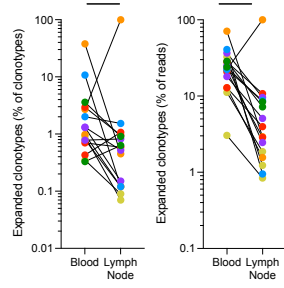

**C** Shared clonotypes

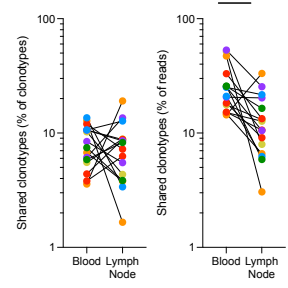

**D** Frequency of shared p24+ and total CD4+ T cells clonotypes

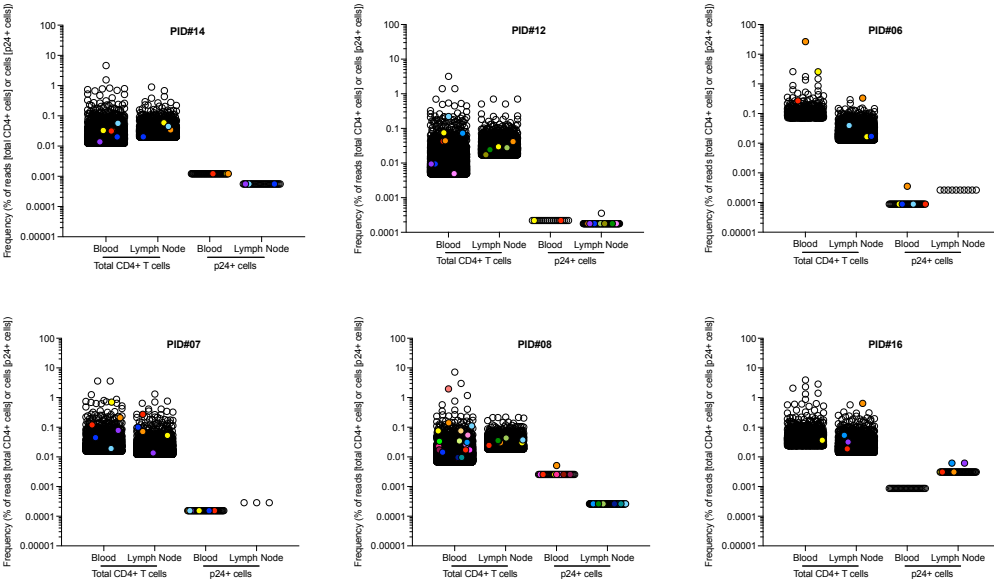

**E**

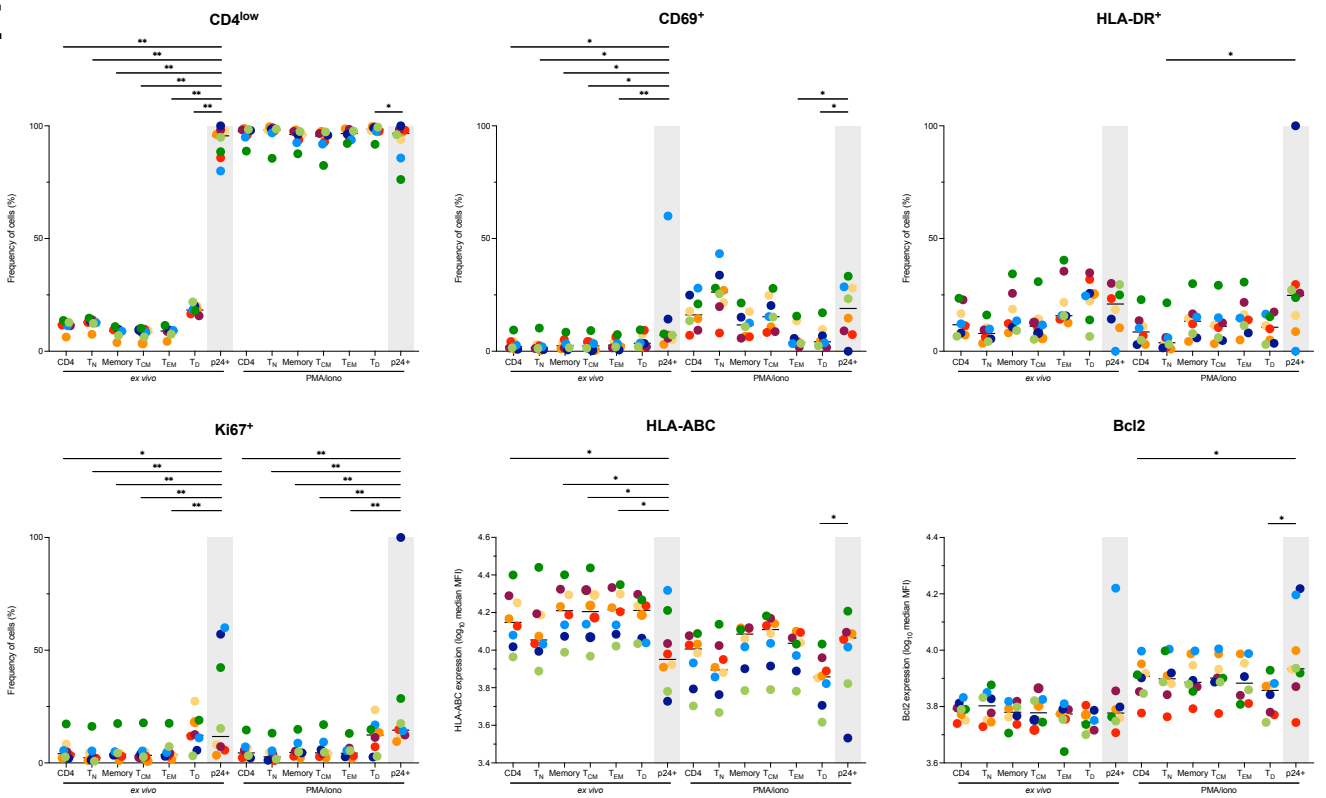



**Figure S7. Distribution of p24<sup>+</sup> and total CD4<sup>+</sup> T cells TCR repertoires in blood and lymph nodes, Related to Figures 5 and 6.**

**A.** Distribution of clonotypes in total CD4<sup>+</sup> T cells from blood and lymph nodes in all participants. Frequencies are shown as percentage of total reads. Dotted line represents the 0.1% frequency threshold. **B.** Frequency of the number and of the percentage of reads of likely expanded clonotypes (>0.1% of total reads) among all detected clonotypes in paired blood and lymph nodes samples, respectively. **C.** Common clonotypes between blood and lymph node samples. Frequency of clonotypes and of reads of common blood/lymph node clonotypes among all clonotypes detected, in blood and lymph node samples, respectively. **D.** Distribution (based on bulk deep sequencing data and single-cell sorting/Sanger sequencing) of clonotypes corresponding to the clones that were found in a single subset (empty circles) and in multiple subsets including p24<sup>+</sup> cells (colored circles). Frequencies are shown as percentage of total reads for total CD4<sup>+</sup> T cells and as the frequency of cells determined by HIV-Flow for p24<sup>+</sup> cells. (Wilcoxon; p<0.05, \*; p<0.01\*\*, p<0.001, \*\*\*, p<0.0001 \*\*\*\*). **E.** The frequency of CD4 expression (CD4<sup>low</sup>), activation markers expression (CD69<sup>+</sup>, HLA-DR<sup>+</sup>, Ki67<sup>+</sup>) and median fluorescence intensity (MFI) of HLA-ABC and Bcl2 is depicted ex vivo or after stimulation with PMA/ionomycin for each participant according to the cell population (total CD4<sup>+</sup>, naïve (TN), total memory (CD45RA<sup>-</sup>), central memory (TCM), effector memory (TEM), terminally differentiated (TD) and p24<sup>+</sup> cells). Statistically significant comparisons with p24<sup>+</sup> cells are highlighted (Wilcoxon; p<0.05, \*; p<0.01\*\*, p<0.001, \*\*\*, p<0.0001 \*\*\*\*).

| PID#  | Analysis |     |     |     | Fiebig stage | Age at Week 0 (years) | Gender | HIV subtype            | Week 0 (Viremic) |            |                     | Week 96 (ART) |            |                     |
|-------|----------|-----|-----|-----|--------------|-----------------------|--------|------------------------|------------------|------------|---------------------|---------------|------------|---------------------|
|       | Pheno    | TCR | Env | NFL |              |                       |        |                        | CD4 (/mm3)       | CD8 (/mm3) | HIV-RNA (copies/mL) | CD4 (/mm3)    | CD8 (/mm3) | HIV-RNA (copies/mL) |
| PID01 | X        | X   |     |     | 1            | 28                    | Male   | CRF01 AE               | 572              | 334        | 37142               | NA            | NA         | NA                  |
| PID02 | X        | X   |     |     | 1            | 25                    | Male   | CRF01 AE               | 577              | 346        | 3385                | NA            | NA         | NA                  |
| PID03 | X        | X   |     |     | 1            | 26                    | Male   | CRF01 AE               | 575              | 513        | 11969               | NA            | NA         | NA                  |
| PID04 | X        | X   |     |     | 2            | 27                    | Male   | CRF01 AE               | 158              | 202        | 2024617             | NA            | NA         | NA                  |
| PID05 | X        | X   |     |     | 2            | 23                    | Male   | CRF01 AE               | 283              | 226        | 6029465             | NA            | NA         | NA                  |
| PID06 | X        | X   |     |     | 2            | 26                    | Male   | CRF01 AE/B Recombinant | 278              | 319        | 6046140             | NA            | NA         | NA                  |
| PID07 | X        | X   |     |     | 3            | 22                    | Male   | CRF01 AE/B Recombinant | 256              | 352        | 6880660             | NA            | NA         | NA                  |
| PID08 | X        | X   |     |     | 3            | 25                    | Male   | CRF01 AE/B Recombinant | 509              | 1045       | 4631002             | NA            | NA         | NA                  |
| PID09 | X        | X   |     |     | 3            | 28                    | Male   | CRF01 AE               | 656              | 820        | 4436997             | NA            | NA         | NA                  |
| PID10 | X        | X   |     |     | 4            | 25                    | Male   | CRF01 AE               | 346              | 677        | 366196              | NA            | NA         | NA                  |
| PID11 | X        | X   |     |     | 4            | 34                    | Male   | CRF01 AE               | 456              | 4556       | 6596826             | NA            | NA         | NA                  |
| PID12 | X        | X   |     |     | 4            | 21                    | Male   | B                      | 236              | 370        | 110572              | NA            | NA         | NA                  |
| PID13 | X        | X   |     |     | 5            | 40                    | Male   | CRF01 AE               | 374              | 1869       | 686329              | NA            | NA         | NA                  |
| PID14 | X        | X   |     | X   | 5            | 39                    | Male   | CRF01 AE               | 625              | 3936       | 277506              | 632           | 610        | <20                 |
| PID15 | X        | X   |     |     | Chronic      | 50                    | Male   | Not Done               | 333              | 1941       | 21377               | NA            | NA         | NA                  |
| PID16 | X        | X   |     | X   | Chronic      | 21                    | Male   | Not Done               | 227              | 688        | 63588               | Not Done      | Not Done   | <34                 |
| PID17 | X        | X   |     |     | Chronic      | 26                    | Male   | Not Done               | 616              | 1170       | 55844               | NA            | NA         | NA                  |
| PID18 | X        |     | X   |     | 1            | 24                    | Male   | CRF01 AE               | 457              | 486        | 146194              | NA            | NA         | NA                  |
| PID19 | X        |     | X   |     | 1            | 25                    | Male   | CRF01 AE               | 537              | 242        | 11674               | NA            | NA         | NA                  |
| PID20 | X        |     | X   |     | 2            | 23                    | Male   | CRF01 AE               | 308              | 941        | 6010006             | NA            | NA         | NA                  |
| PID21 | X        |     | X   |     | 2            | 20                    | Male   | CRF01 AE               | 307              | 297        | 68393               | NA            | NA         | NA                  |
| PID22 | X        |     | X   |     | 3            | 36                    | Male   | CRF01 AE               | 488              | 3269       | 1107430             | NA            | NA         | NA                  |
| PID23 | X        |     | X   |     | 3            | 41                    | Male   | CRF01 AE/B Recombinant | 552              | 2036       | 7895089             | NA            | NA         | NA                  |
| PID24 | X        |     | X   |     | 5            | 20                    | Male   | CRF01 AE               | 233              | 2531       | 5541200             | NA            | NA         | NA                  |
| PID25 | X        |     | X   |     | Chronic      | 20                    | Male   | CRF01 AE               | 345              | 865        | 19986               | NA            | NA         | NA                  |
| PID26 |          |     |     | X   | 2            | 26                    | Male   | CRF01 AE/B Recombinant | 249              | 430        | 736615              | 397           | 492        | <20                 |
| PID27 |          |     |     | X   | 2            | 22                    | Male   | CRF01 AE               | 641              | 481        | 11350800            | 1204          | 1058       | <20                 |
| PID28 |          |     |     | X   | 3            | 22                    | Male   | CRF01 AE               | 233              | 172        | 4416897             | 534           | 367        | <20                 |
| PID29 |          |     |     | X   | 3            | 27                    | Male   | CRF01 AE/B Recombinant | 457              | 640        | 5286145             | 598           | 781        | <20                 |
| PID30 |          |     |     | X   | 4            | 22                    | Male   | CRF01 AE               | 571              | 552        | 14673               | 960           | 757        | <20                 |
| PID31 |          |     |     | X   | Chronic      | 45                    | Male   | CRF01 AE               | 30               | 708        | 723346              | 267           | 1244       | <34                 |

Table S1. Participants' characteristics, Related to Figure 1.

M, male; ART, antiretroviral therapy; TCR, T-cell receptor sequencing substudy; Env, HIV Env C2-V5 sequencing substudy; NFL, near-full length HIV genome sequencing substudy; NA, not applicable.

| Name                                                       | Sequence 5'-3'                                     |
|------------------------------------------------------------|----------------------------------------------------|
| <b>PCR1 : Forward primers (tagged with M13F)</b>           |                                                    |
| VB2                                                        | GTAAAACGACGGCCAGTACTTCTATTGGTACAGACAAATCTTGG       |
| VB3                                                        | GTAAAACGACGGCCAGTCTATGTATTGGTATAAACAGGACTCTAAG     |
| VB4                                                        | GTAAAACGACGGCCAGTCAYARSGCTATGTATTGGTACAAGC         |
| VB5/9                                                      | GTAAAACGACGGCCAGTCACTGTGTCCTGGTACCAACAG            |
| VB6                                                        | GTAAAACGACGGCCAGTTACATGTAAGTGGTATCGACAAGACC        |
| VB7                                                        | GTAAAACGACGGCCAGTTACCCTTTATTGGTACCGACAGAGCCTGG     |
| VB11                                                       | GTAAAACGACGGCCAGTCTTTACTGGTACCGGCAGAWCYTGG         |
| VB12                                                       | GTAAAACGACGGCCAGTTTTTCTGGTACAGACAGACCATGATG        |
| VB13                                                       | GTAAAACGACGGCCAGTCACTGTCTACTGGTACCAGCAGG           |
| VB14                                                       | GTAAAACGACGGCCAGTTGGACATGATAATCTTTATTGGTATCGAC     |
| VB15                                                       | GTAAAACGACGGCCAGTCATGTAAGTGGTACCGACAGAAGTC         |
| VB16                                                       | GTAAAACGACGGCCAGTGTATGTTTTTGGTACCAACAGGTCC         |
| VB17                                                       | GTAAAACGACGGCCAGTCATGTTTGTCTACTGGTACCGACAGAATC     |
| VB18                                                       | GTAAAACGACGGCCAGTAGTCATGTTTACTGGTATCGGCAGC         |
| VB19                                                       | GTAAAACGACGGCCAGTTGCCATGTAAGTGGTACCGACAG           |
| VB20                                                       | GTAAAACGACGGCCAGTCACAACATGTTTTGGTATCGTCAG          |
| VB21                                                       | GTAAAACGACGGCCAGTTAGTTATGTTTACTGGTATCATAAGACGC     |
| VB23                                                       | GTAAAACGACGGCCAGTATACTTTTTGTTTATTGGTATCAACAGAATCAG |
| VB24                                                       | GTAAAACGACGGCCAGTATGTAAGTGGTATCGACAAGACCC          |
| VB25                                                       | GTAAAACGACGGCCAGTTGACAAAATGTAAGTGGTATCAACAAGATC    |
| VB29                                                       | GTAAAACGACGGCCAGTTGATGTTCTGGTACCGTCAGCAAC          |
| VB30                                                       | GTAAAACGACGGCCAGTCAACCTATACTGGTACCGACAGG           |
| <b>PCR1 : Reverse primers (tagged with M13R)</b>           |                                                    |
| JB1-1                                                      | CAGGAAACAGCTATGACCAACTGTGAGTCTGGTGCCTTGCCAAAG      |
| JB1-2                                                      | CAGGAAACAGCTATGACAACCTGGTCCCCGAACCGAAGG            |
| JB1-3                                                      | CAGGAAACAGCTATGACAACAGTGAGCCAACCTCCCTCTCCAAAATA    |
| JB1-4                                                      | CAGGAAACAGCTATGACCAGAGAGCTGGTTCCACTGCCAAAAAACA     |
| JB1-5                                                      | CAGGAAACAGCTATGACAGAGTCGAGTCCCATACCAAAAATGC        |
| JB1-6                                                      | CAGGAAACAGCTATGACCTGGTCCCATTCCCAAAGTGGAGG          |
| JB2-1                                                      | CAGGAAACAGCTATGACAGCCGTGTCCTGGCCCCGAAGAAC          |
| JB2-2                                                      | CAGGAAACAGCTATGACCGTTTTTGGAGAAGGCTCTAGGCTGACC      |
| JB2-3                                                      | CAGGAAACAGCTATGACCAGCCGGGTGCCTGAGCCAAAATAC         |
| JB2-4                                                      | CAGGAAACAGCTATGACCGGTACGGCGCCGAAGTAC               |
| JB2-5                                                      | CAGGAAACAGCTATGACAGCCGCTCCTGGCCCCGAAG              |
| JB2-6                                                      | CAGGAAACAGCTATGACCTGCCGGCCCCGAAAGTCAGG             |
| JB2-7                                                      | CAGGAAACAGCTATGACCTGGTGCCCCGACCCGAAG               |
| <b>PCR2 and Sequencing: Forward and Reverse primers</b>    |                                                    |
| M13F                                                       | GTAAAACGACGGCCAGT                                  |
| M13R                                                       | CAGGAAACAGCTATGAC                                  |
| <b>PCR3 (MiSeq adaptors) : Forward and Reverse primers</b> |                                                    |
| CS1-M13F                                                   | ACACTGACGACATGGTTCTACAGTAAAACGACGGCCAGT            |
| CS2-M13R                                                   | TACGGTAGCAGAGACTTGGTCTCAGGAAACAGCTATGAC            |
| <b>PCR1 : HIV Env AE C2-V5</b>                             |                                                    |
| Env7                                                       | AATGGCAGTCTAGCAGAAG                                |
| OutV5R_AE                                                  | TCCTAGTGGTTCAATTTGTAAGTAC                          |
| <b>PCR2 and Sequencing : HIV Env AE C2-V5</b>              |                                                    |
| Env7                                                       | AATGGCAGTCTAGCAGAAG                                |
| InV5R_AE                                                   | ACTTCTCCAATTGTCCTTTA                               |
| <b>PCR1: near full-length HIV AE</b>                       |                                                    |
| 263-AE-F                                                   | AGGGACTCGAAAGCGRAAGT                               |
| BlouterR                                                   | TGAGGGATCTCTAGTTACCAGAGTC                          |
| <b>PCR2: near full-length HIV AE</b>                       |                                                    |
| 652-AE-F                                                   | ACTCGAAAGCGRAAGTTCCAGAG                            |
| 280-AE-R                                                   | CTAGTTACCAGAGTCCTAACACAGAYG                        |

Table S2. Primers used for amplification and sequencing of TCR $\beta$ , HIV env and near-full length HIV genomes, Related to Figures 3, 4 and 7.
